# Supplementary material for: In-Depth Investigation of Conjunctival Swabs and Tear Fluid of Symptomatic COVID-19 Patients, an Observational Cohort Study
Source: PubMed Central journal article supplement — Transl Vis Sci Technol. 2021 Oct 21;10(12):32. doi: 10.1167/tvst.10.12.32 (PMC8543390; doi:10.1167/tvst.10.12.32), 2021-10-21
Supplement: tvst-10-12-32_s001.pdf [file tvst-10-12-32_s001.pdf]

|                                        | Case 18                                | Case 19               | Case 20                                         | Case 21                                                                                                                   | Case 22                                          | Case 23                                           |
|----------------------------------------|----------------------------------------|-----------------------|-------------------------------------------------|---------------------------------------------------------------------------------------------------------------------------|--------------------------------------------------|---------------------------------------------------|
| Demographics                           |                                        |                       |                                                 |                                                                                                                           |                                                  |                                                   |
| Age                                    | 71                                     | 44                    | 51                                              | 61                                                                                                                        | 47                                               | 59                                                |
| Sex                                    | F                                      | M                     | F                                               | M                                                                                                                         | F                                                | M                                                 |
| Group                                  | Hospitalized patient                   | Hospitalized patient  | Health care worker                              | Health care worker                                                                                                        | Hospitalized patient                             | Health care worker                                |
| Hospitalization days                   | 18                                     | 3                     | 0                                               | 0                                                                                                                         | 27                                               | 0                                                 |
| Hospitalization days at ICU            | 0                                      | 0                     | 0                                               | 0                                                                                                                         | 0                                                | 0                                                 |
| Laboratory specimen results            |                                        |                       |                                                 |                                                                                                                           |                                                  |                                                   |
| Nasopharynx Ct values (in-house PCR)   |                                        |                       |                                                 |                                                                                                                           |                                                  |                                                   |
| E gene                                 | 16.6*                                  | NA                    | 17.4                                            | 19.6                                                                                                                      | 15.6                                             | 19.6                                              |
| N1 gene                                | 18.6*                                  | NA                    | 17.9                                            | 20.2                                                                                                                      | 15.1                                             | 18.7                                              |
| Conjunctival Ct values (in-house PCR)  |                                        |                       |                                                 |                                                                                                                           |                                                  |                                                   |
| E gene                                 | UD                                     | UD                    | UD                                              | 42.0                                                                                                                      | UD                                               | UD                                                |
| N1 gene                                | 37.9                                   | 42.0                  | 42.0                                            | 37.7                                                                                                                      | 42.0                                             | 38.1                                              |
| Conjunctival Ct values (GeneXpert PCR) |                                        |                       |                                                 |                                                                                                                           |                                                  |                                                   |
| E gene                                 | UD                                     | UD                    | UD                                              | UD                                                                                                                        | UD                                               | UD                                                |
| N2 gene                                | UD                                     | UD                    | UD                                              | UD                                                                                                                        | UD                                               | UD                                                |
| COVID symptoms                         |                                        |                       |                                                 |                                                                                                                           |                                                  |                                                   |
|                                        | Fever, cold, gastrointestinal symptoms | Cough, fever, dyspnea | Cold, loss of smell and taste, myalgia, fatigue | Cough, headache, cold, loss of smell and taste, myalgia, feeling ill, extreme fatigue, anorexia, increased sweating, pain | Cough, fever, myalgia, gastrointestinal symptoms | Fever, headache, loss of smell and taste, myalgia |
| Medical history                        |                                        |                       |                                                 |                                                                                                                           |                                                  |                                                   |

|  |                                                                                  |                             |          |    |                                                        |          |
|--|----------------------------------------------------------------------------------|-----------------------------|----------|----|--------------------------------------------------------|----------|
|  | Hospitalized for relumpectomy for mammarcarcinoma and acute kidney insufficiency | Crohn's disease, depression | Obesitas | NA | Hospitalized for endophlebectomy, deep vein thrombosis | Diabetes |
|--|----------------------------------------------------------------------------------|-----------------------------|----------|----|--------------------------------------------------------|----------|

**Table S1. Laboratory findings and clinical characteristics of patients with a semi-positive conjunctival sample (confirmed by 1 PCR assay), UD, undetectable, NA, notavailable,**

\*testedbyGeneXpert PCR assay in another testing facility
